# Supplementary material for: Effect of Controlling Thiophene Rings on D-A Polymer Photocatalysts Accessed via Direct Arylation for Hydrogen Production
Source: MDPI journal article supplement (doi:10.3390/molecules28114507), 2023-06-01
Supplement: s1 [file s1]

# Supporting Information

For

## Effect of Controlling Thiophene Rings on D-A Polymer Photocatalysts Accessed via Direct Arylation for Hydrogen Production

Dongnai Ye <sup>1,2</sup>, Lei Liu <sup>1</sup>, Qimin Peng <sup>1</sup>, Jiabin Qiu <sup>1,\*</sup>, Hao Gong <sup>1</sup>, Aiguo Zhong <sup>3</sup> and Shiyong Liu <sup>1,\*</sup>

<sup>1</sup> Jiangxi Provincial Key Laboratory of Functional Molecular Materials Chemistry, College of Materials, Metallurgical and Chemistry, Jiangxi University of Science and Technology, Ganzhou 341000, China; yedongnai2014@gnnu.edu.cn (D.Y.); 13125257083@139.com (L.L.); qm2474572831@163.com (Q.P.); 6720210821@mail.jxust.edu.cn (H.G.)

<sup>2</sup> School of Chemistry and Chemical Engineering, Gannan Normal University, Ganzhou 341000, China

<sup>3</sup> Department of Pharmacy & Chemistry, Taizhou University, Taizhou 318000, China; zhongaiguo@tzc.edu.cn

\* Correspondence: jiabinqiu@jxust.edu.cn (J.Q.); chelsy@jxust.edu.cn or chelsy@zju.edu.cn (S.L.)

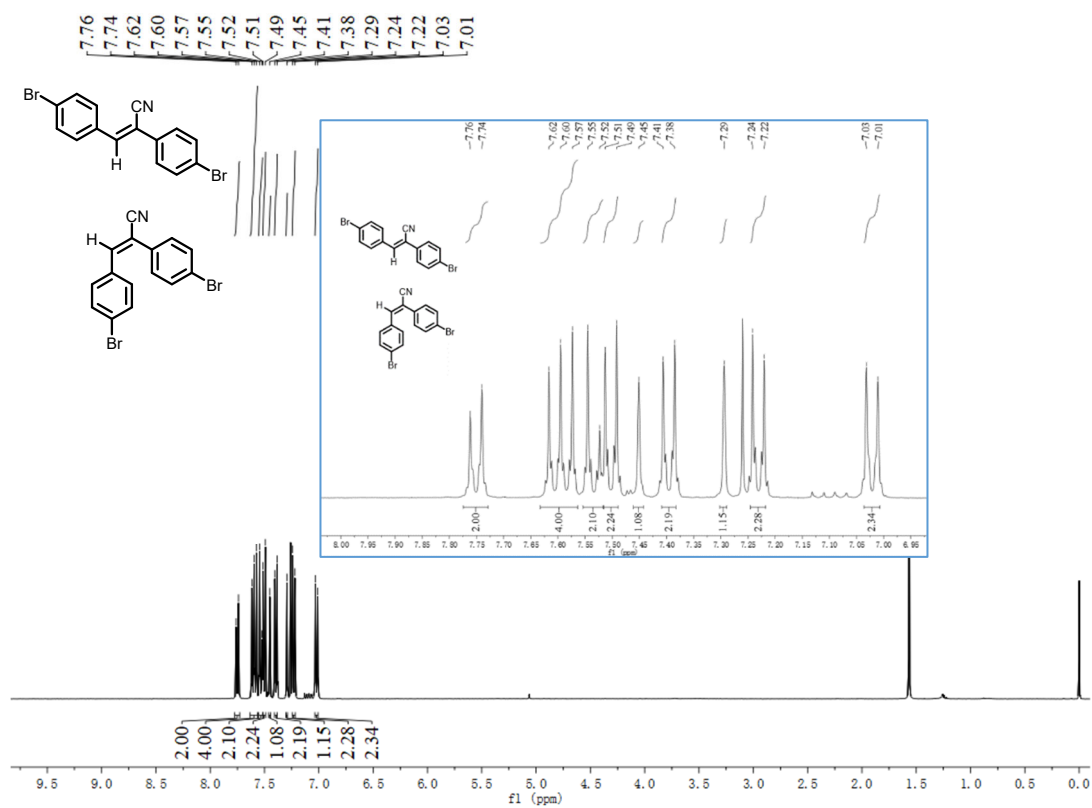

**Figure. S1.** <sup>1</sup>H NMR spectra of DBCS in CDCl<sub>3</sub>.

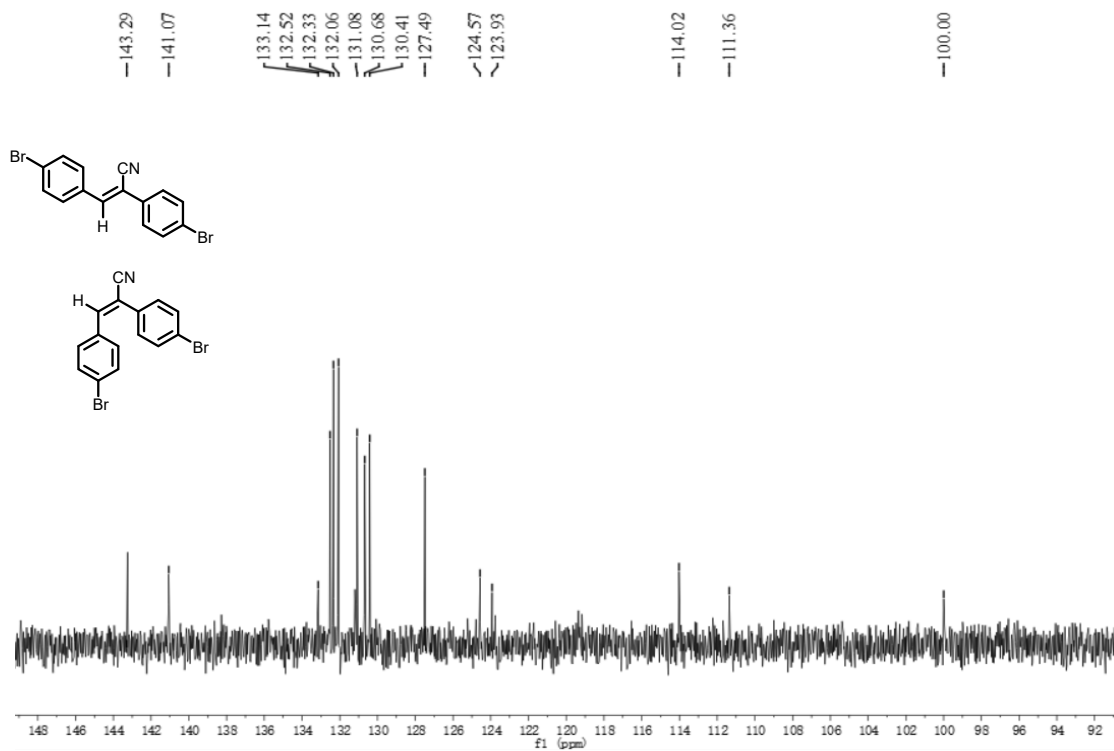

**Figure. S2.** <sup>13</sup>C NMR spectra of DBCS in CDCl<sub>3</sub>.

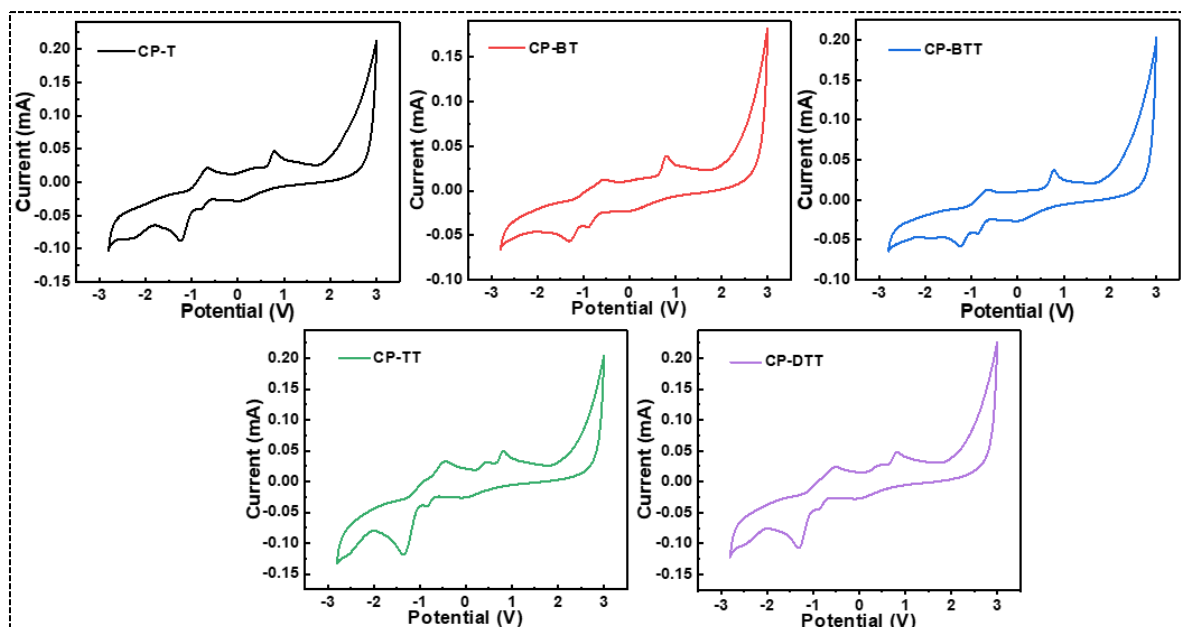

**Figure. S3.** CV curves of the as-prepared CPs.

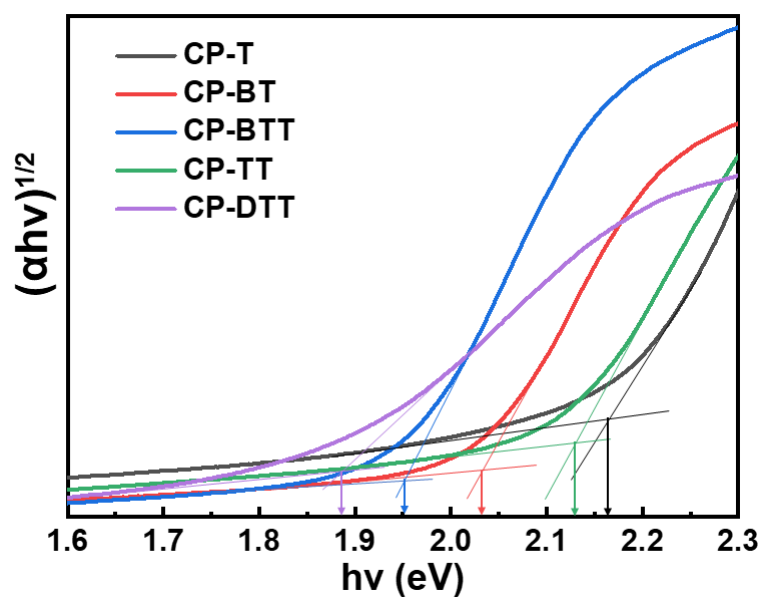

**Figure. S4.** Tauc plots of the transformed Kubelka-Munk function vs energy of CPs.
